# Supplementary material
Source: PubMed Central journal article supplement (PMC9286709)
Supplement: mmc1.pdf [file mmc1.pdf]

# THE LANCET

## Infectious Diseases

### Supplementary appendix

This appendix formed part of the original submission and has been peer reviewed. We post it as supplied by the authors.

Supplement to: McMenamin ME, Nealon J, Lin Y, et al. Vaccine effectiveness of one, two, and three doses of BNT162b2 and CoronaVac against COVID-19 in Hong Kong: a population-based observational study. *Lancet Infect Dis* 2022; published online July 15. [https://doi.org/10.1016/S1473-3099\(22\)00345-0](https://doi.org/10.1016/S1473-3099(22)00345-0).

## Vaccine effectiveness of two and three doses of BNT162b2 and CoronaVac against COVID-19 in Hong Kong: a population-based observational study - supplementary appendix

**Appendix Table 1** Definitions for severe and critical-to-fatal cases

| Outcome               | Classification          | Criteria                                                                                                                                                                   |
|-----------------------|-------------------------|----------------------------------------------------------------------------------------------------------------------------------------------------------------------------|
| Fatal disease         |                         | Death with 28 days of a positive COVID test                                                                                                                                |
| Severe/fatal disease  | Critical-to-fatal cases | Patient in Intensive Care Unit, or intubated, or require Extracorporeal Membrane Oxygenation (ECMO), or in shock                                                           |
|                       | Serious cases           | Fatal outcome within 28 days of a positive test result<br>Require oxygen supplement of 3 Litres per minute or more                                                         |
| Mild/moderate disease | Mild-to-moderate cases  | Not being classified as either serious or critical as their worst condition during hospitalization, and not experiencing a fatal outcome within 28 days of a positive test |

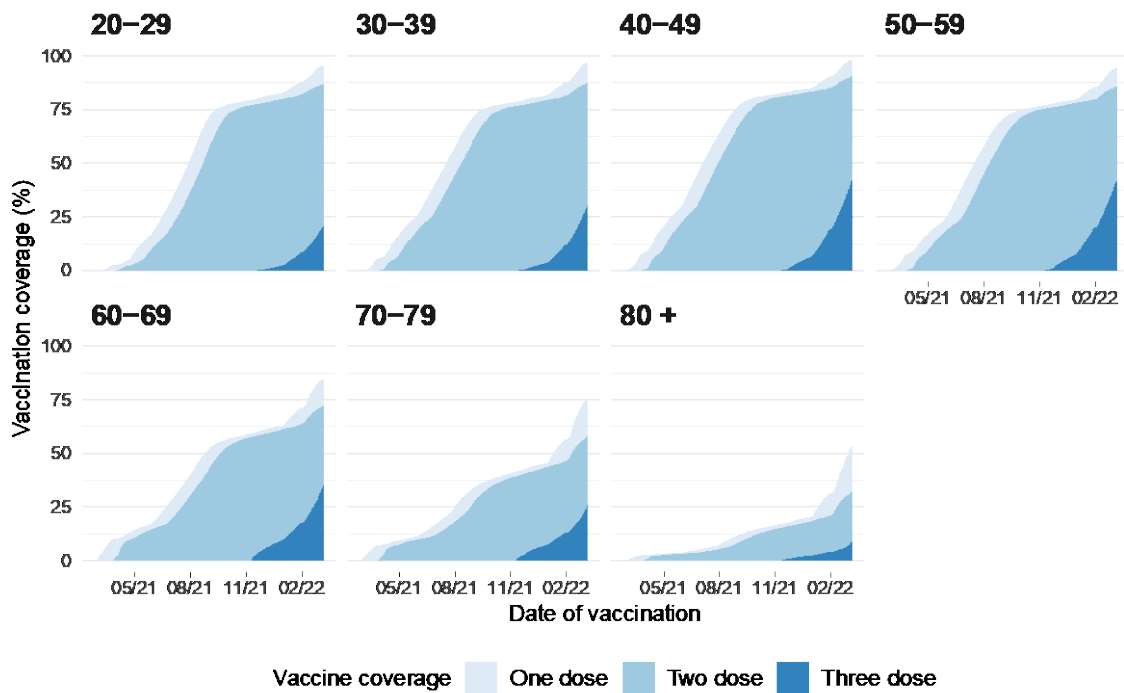

**Appendix Figure 1** Vaccination coverage in Hong Kong for first, second and third doses of either BNT162b2 or CoronaVac vaccines by age group since the beginning of vaccination programme in Feb 2021

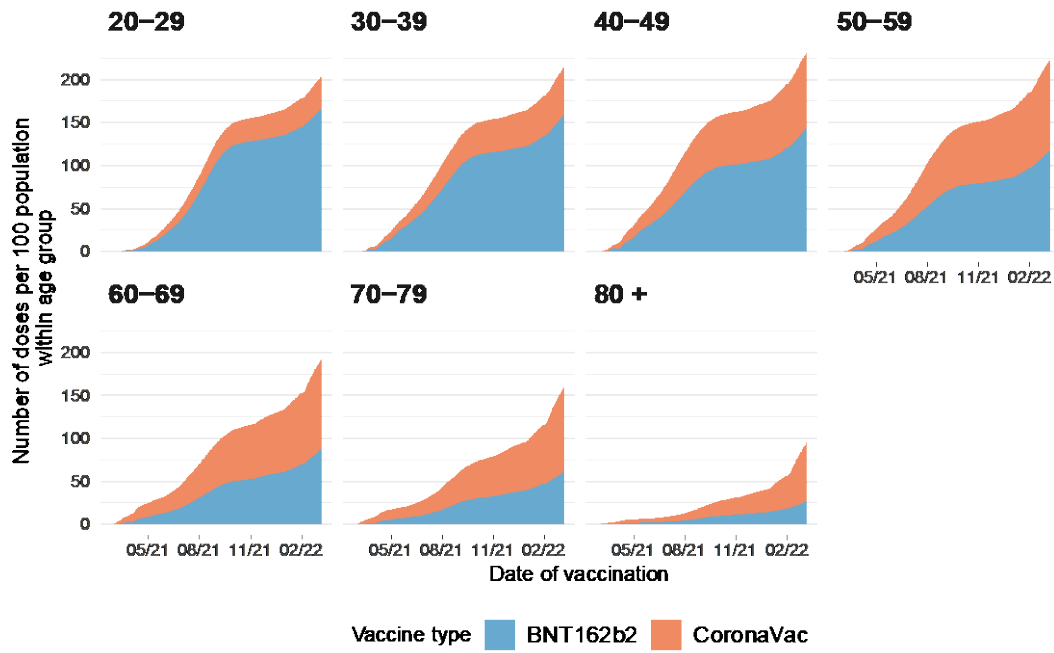

**Appendix Figure 2** Number of doses administered over time throughout the vaccination programme in Hong Kong by vaccine type and age group. Note: Administration of CoronaVac vaccine started on February 26, 2021 and administration of BNT162b2 started on March 10, 2021

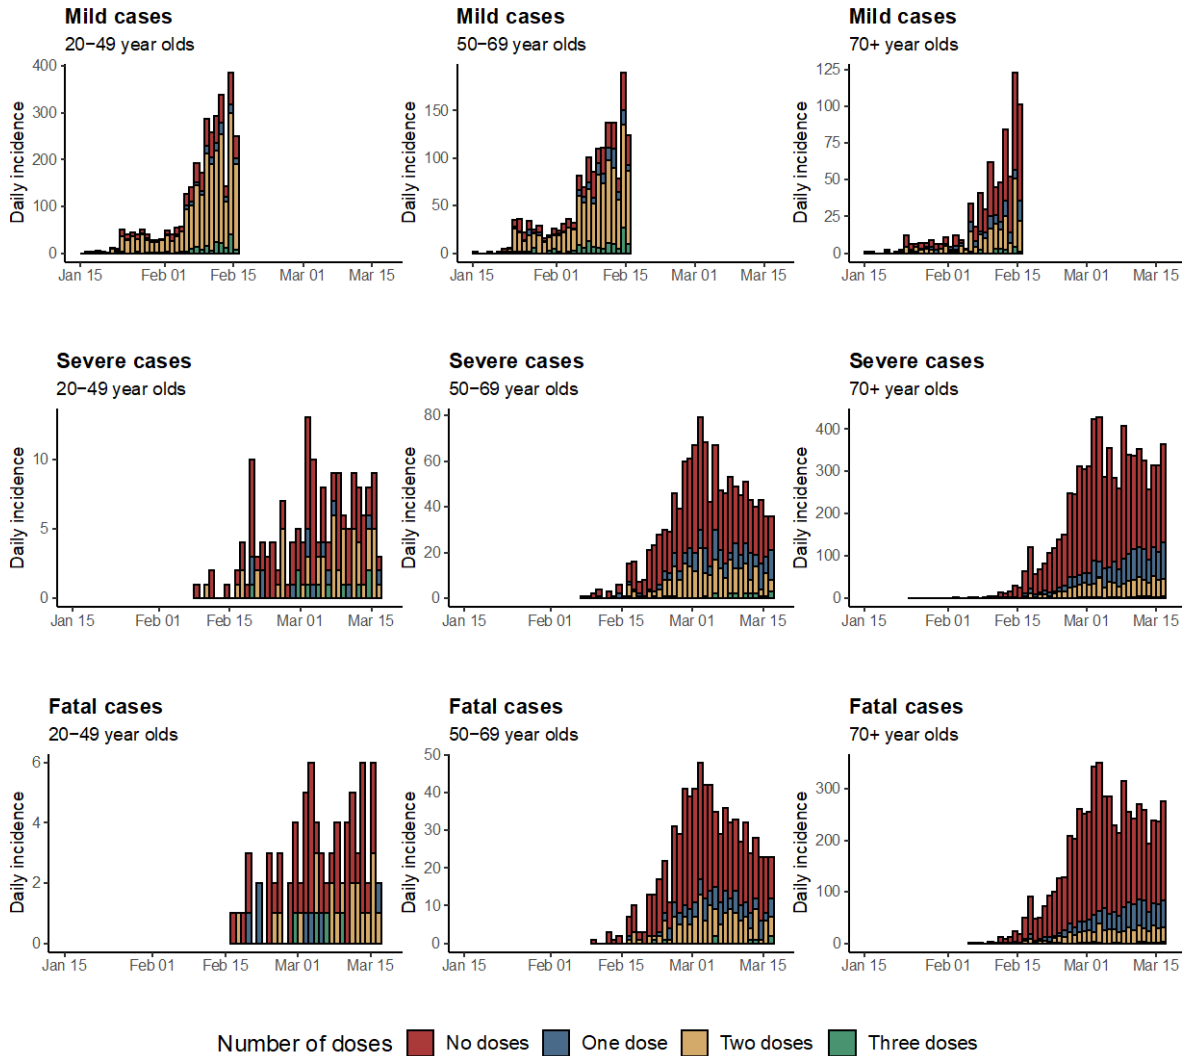

**Appendix Figure 3** Daily incidence mild/moderate, severe/fatal and fatal cases by age group and vaccination status, where mild was the worst recorded condition by HA and severe disease was defined as ever having been listed as ‘Serious’ or ‘Critical’ by HA during hospitalisation or experiencing fatal COVID-19

**Appendix Table 2.** Overall absolute and relative vaccine effectiveness estimates for two or three dose schedules of either BNT162b2 and CoronaVac vaccines against mild/moderate infection, severe/fatal disease and death between 31 Dec 2021 and 16 Mar 2022 in Hong Kong, where estimates are obtained using a negative binomial rate model to estimate incidence rate ratio (IRR), and VE is defined as  $1 - \text{IRR}$ .

|                              | Two doses         | Three doses       |                           |
|------------------------------|-------------------|-------------------|---------------------------|
|                              | VE (%)            | VE (%)            | rVE of three vs two doses |
| <b>Mild/moderate disease</b> |                   |                   |                           |
| All ages                     | 15.8 (7.6, 23.3)  | 59.9 (53.4, 65.6) | 50.4 (43.7, 56.5)         |
| 20-49                        | 38.4 (30.0, 45.7) | 68.2 (60.7, 74.3) | 48.2 (38.1, 56.9)         |
| 50-69                        | None <sup>a</sup> | 39.3 (23.0, 52.4) | 48.3 (37.4, 57.6)         |
| 70 +                         | None <sup>a</sup> | 67.0 (48.5, 80.0) | 68.3 (49.5, 81.1)         |
| <b>Severe/fatal disease</b>  |                   |                   |                           |
| All ages                     | 84.6 (82.4, 86.6) | 97.9 (97.3, 98.4) | 82.0 (76.9, 86.1)         |
| 20-49                        | 96.1 (94.4, 97.3) | 98.2 (96.6, 99.1) | 51.2 (6.3, 77.0)          |
| 50-69                        | 88.5 (85.6, 90.8) | 98.6 (97.8, 99.1) | 86.0 (78.0, 91.5)         |
| 70 +                         | 74.5 (69.4, 78.8) | 97.2 (95.9, 98.1) | 82.4 (75.7, 87.5)         |
| <b>Mortality</b>             |                   |                   |                           |
| All ages                     | 85.9 (83.5, 88.0) | 98.6 (98.0, 99.0) | 85.6 (80.1, 89.8)         |
| 20-49                        | 97.3 (95.5, 98.4) | 98.8 (97.0, 99.6) | 53.6 (-24.8, 86.6)        |
| 50-69                        | 90.6 (87.9, 92.7) | 99.3 (98.6, 99.7) | 91.0 (82.5, 96.0)         |
| 70 +                         | 77.6 (72.7, 81.7) | 97.9 (96.8, 98.7) | 84.5 (77.2, 89.8)         |

<sup>a</sup> No evidence of protection based on a negative or very small positive point estimate and wide confidence intervals.

**Appendix Table 3.** Vaccine effectiveness by dose (one, two, three) and vaccine type (CoronaVac, BNT162b2) in all ages and within age categories (mild/moderate: 20-59,  $\geq 60$ ; severe/fatal, fatal: 20-59, 60-69, 70-79,  $\geq 80$  years) against COVID-19 related mild/moderate disease, severe/fatal disease and death: sensitivity analysis stratifying by calendar week instead of calendar day

|                              | One dose              |                       | Two doses             |                       | Three doses          |                       |
|------------------------------|-----------------------|-----------------------|-----------------------|-----------------------|----------------------|-----------------------|
|                              | BNT162b2              | CoronaVac             | BNT162b2              | CoronaVac             | BNT162b2             | CoronaVac             |
| <b>Mild/moderate disease</b> |                       |                       |                       |                       |                      |                       |
| 20-59 years                  | None <sup>a</sup>     | None <sup>a</sup>     | None <sup>a</sup>     | None <sup>a</sup>     | 74.1<br>(46.5, 87.4) | 58.4<br>(16.2, 79.5)  |
| $\geq 60$ years              | None <sup>a</sup>     | None <sup>a</sup>     | None <sup>a</sup>     | None <sup>a</sup>     | 78.3<br>(41.0, 92.6) | 49.3<br>(-27.5, 80.5) |
| <b>Severe/fatal disease</b>  |                       |                       |                       |                       |                      |                       |
| 20-59 years                  | 97.0<br>(92.9, 98.9)  | 77.5<br>(60.8, 87.4)  | 96.7<br>(94.8, 97.9)  | 93.2<br>(89.1, 95.9)  | 99.0<br>(97.8, 99.6) | 99.3<br>(98.1, 99.8)  |
| 60-69 years                  | 56.2<br>(-18.6, 84.1) | 59.1<br>(10.7, 81.5)  | 89.4<br>(75.7, 95.4)  | 79.0<br>(56.3, 89.9)  | 99.1<br>(96.5, 99.8) | 98.1<br>(94.2, 99.4)  |
| 70-79 years                  | 70.3<br>(29.7, 87.8)  | 32.0<br>(-34.7, 65.8) | 89.3<br>(76.3, 95.3)  | 70.4<br>(44.2, 84.3)  | 99.4<br>(97.5, 99.9) | 96.6<br>(90.9, 98.8)  |
| $\geq 80$ years              | 70.7*<br>(62.2, 77.8) | 40.3*<br>(35.3, 44.9) | 85.9*<br>(82.5, 88.8) | 62.7*<br>(59.0, 66.1) | 94.5<br>(78.6, 98.7) | 95.2*<br>(92.3, 97.2) |
| <b>Mortality</b>             |                       |                       |                       |                       |                      |                       |
| 20-59 years                  | 97.9<br>(93.5, 99.5)  | 81.0<br>(63.3, 90.5)  | 97.6<br>(95.6, 98.7)  | 94.7<br>(90.6, 97.1)  | 99.5<br>(98.5, 99.9) | 99.7<br>(98.8, 99.9)  |
| 60-69 years                  | 62.0<br>(-21.3, 88.5) | 67.7<br>(25.3, 86.3)  | 91.6<br>(79.9, 96.5)  | 82.6<br>(61.6, 92.2)  | 99.2<br>(96.1, 99.9) | 99.4<br>(96.9, 99.9)  |
| 70-79 years                  | 83.6<br>(51.4, 94.8)  | 48.3<br>(-17.8, 77.5) | 90.8<br>(87.2, 93.6)  | 71.7<br>(43.1, 85.9)  | 99.2<br>(97.4, 99.9) | 97.8<br>(92.7, 99.4)  |
| $\geq 80$ years              | 73.7*<br>(64.9, 80.9) | 46.0*<br>(40.9, 50.8) | 88.2*<br>(84.8, 91.0) | 67.1*<br>(63.3, 70.5) | 94.5<br>(75.8, 98.9) | 95.9*<br>(92.9, 97.8) |

\*No evidence of overdispersion resulting in a Poisson model fit

<sup>a</sup> No evidence of protection based on a negative or very small positive point estimate and wide confidence intervals.

**Appendix Table 4.** Vaccine effectiveness by dose (one, two, three) and vaccine type (CoronaVac, BNT162b2) in all ages and within age categories (mild/moderate: 20-59,  $\geq 60$ ; severe/fatal, fatal: 20-59, 60-69, 70-79,  $\geq 80$  years) against COVID-19 related mild/moderate disease, severe/fatal disease and death: sensitivity analysis assuming 7 days between vaccination and immune response

|                              | One dose             |                       | Two doses            |                      | Three doses          |                      |
|------------------------------|----------------------|-----------------------|----------------------|----------------------|----------------------|----------------------|
|                              | BNT162b2             | CoronaVac             | BNT162b2             | CoronaVac            | BNT162b2             | CoronaVac            |
| <b>Mild/moderate disease</b> |                      |                       |                      |                      |                      |                      |
| 20-59 years                  | 25.0<br>(7.1, 39.9)  | 22.3<br>(1.8, 39.1)   | 31.6<br>(22.5, 39.5) | 21.5<br>(10.4, 31.2) | 65.8<br>(57.4, 72.7) | 43.3<br>(30.5, 53.9) |
| $\geq 60$ years              | None <sup>a</sup>    | None <sup>a</sup>     | None <sup>a</sup>    | None <sup>a</sup>    | 65.0<br>(46.6, 78.1) | 20.1<br>(-6.3, 40.8) |
| <b>Severe/fatal disease</b>  |                      |                       |                      |                      |                      |                      |
| 20-59 years                  | 88.6<br>(80.5, 93.9) | 58.8<br>(42.3, 70.9)  | 96.0<br>(94.4, 97.1) | 90.5<br>(87.1, 93.1) | 97.9<br>(96.4, 98.9) | 98.1<br>(96.3, 99.2) |
| 60-69 years                  | 62.2<br>(40.9, 76.5) | 33.8<br>(9.1, 52.0)   | 89.8<br>(85.2, 93.1) | 76.7<br>(68.4, 82.9) | 98.5<br>(96.6, 99.4) | 96.0<br>(93.0, 97.9) |
| 70-79 years                  | 56.9<br>(35.4, 71.8) | -1.2<br>(-31.1, 22.2) | 88.6<br>(83.3, 92.3) | 68.3<br>(59.1, 75.6) | 98.3<br>(96.2, 99.4) | 94.6<br>(91.0, 96.9) |
| $\geq 80$ years              | 62.2<br>(42.6, 75.4) | 17.6<br>(-6.3, 36.3)  | 86.0<br>(79.2, 90.7) | 49.5<br>(33.9, 61.5) | 96.0<br>(92.0, 98.2) | 95.9<br>(92.7, 97.8) |
| <b>Mortality</b>             |                      |                       |                      |                      |                      |                      |
| 20-59 years                  | 91.9<br>(82.5, 96.9) | 63.0<br>(43.2, 76.5)  | 96.6<br>(94.8, 97.9) | 92.6<br>(88.9, 95.2) | 98.5<br>(96.7, 99.4) | 98.9<br>(97.1, 99.7) |
| 60-69 years                  | 66.0<br>(42.9, 80.6) | 49.5<br>(28.0, 65.0)  | 92.0<br>(87.6, 95.0) | 82.6<br>(75.5, 87.7) | 98.5<br>(96.3, 99.6) | 98.9<br>(96.4, 99.6) |
| 70-79 years                  | 68.4<br>(48.4, 81.3) | 20.2<br>(-7.9, 41.3)  | 91.4<br>(86.6, 94.7) | 72.0<br>(62.5, 79.2) | 99.0<br>(97.1, 99.8) | 96.7<br>(93.5, 98.5) |
| $\geq 80$ years              | 69.4<br>(51.6, 81.0) | 22.6<br>(-1.6, 41.1)  | 89.7<br>(83.9, 93.5) | 55.4<br>(40.2, 66.8) | 96.4<br>(92.3, 98.5) | 96.8<br>(93.9, 98.4) |

<sup>a</sup> No evidence of protection based on a negative or very small positive point estimate and wide confidence intervals.
